# Supplementary material
Source: Springer Nature journal article supplement (https://www.springermedizin.de/resource/supplementary/12962_2006_43_MOESM1_ESM.pdf/9572014)

No-ART Model

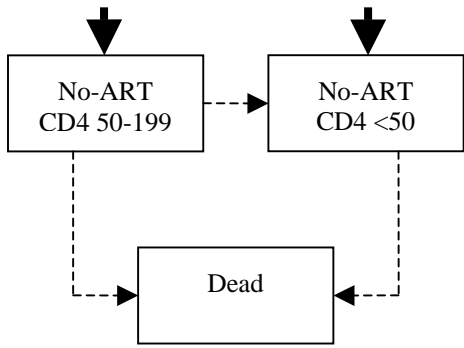

ART Model

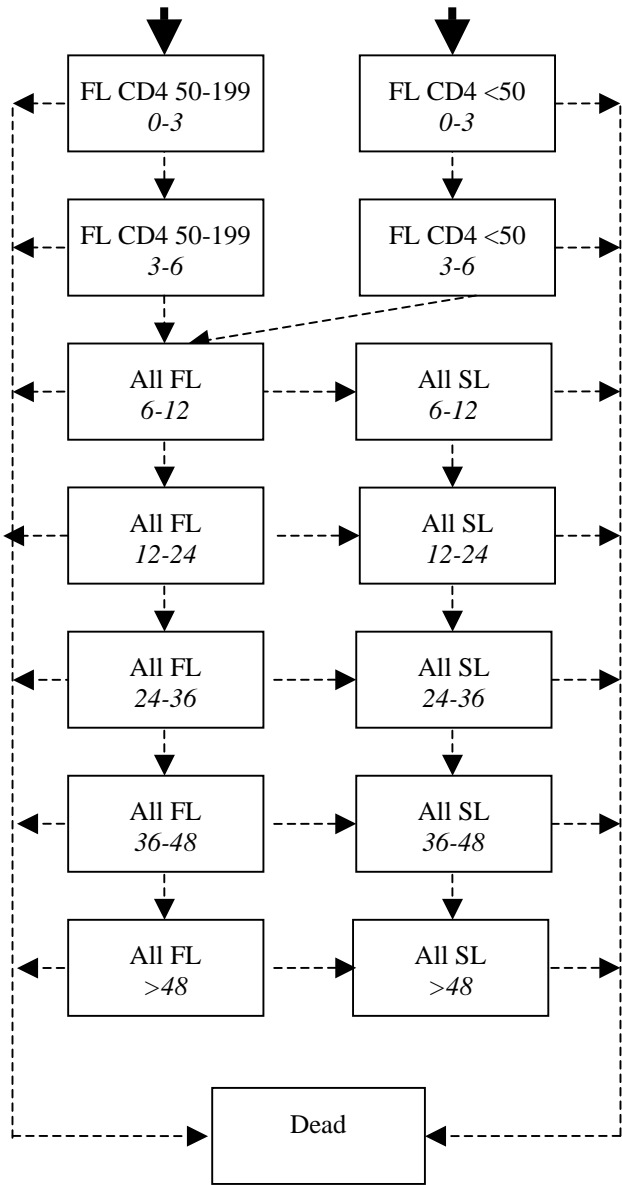

Supplement: MOESM1 [file 9572014]
